# Supplementary material
Source: Research Square preprint supplement (doi:10.21203/rs.3.rs-5946893/v1)
Supplement: Supplementary file 1 [file 28f0f5db48222420d129652a.docx]

We are writing to confirm that our study, titled [Study Title], follows the CONSORT 2010 checklist for reporting randomized controlled trials. We acknowledge the importance of adhering to rigorous reporting standards to ensure transparency, reproducibility, and clarity in our findings.

The CONSORT 2010 checklist has been fully incorporated into our study documentation, covering all essential aspects such as trial design, methodology, participant flow, outcome reporting, and statistical analysis. We have ensured that all items are addressed in accordance with the guidelines to facilitate comprehensive peer review and critical appraisal.

Please let us know if any further documentation or clarification is required. We appreciate your guidance and look forward to your feedback.
